# Supplementary material for: Deletion of TXNIP Mitigates High-Fat Diet-Impaired Angiogenesis and Prevents Inflammation in a Mouse Model of Critical Limb Ischemia
Source: Antioxidants (Basel). 2017 Jun 29;6(3):47. doi: 10.3390/antiox6030047 (PMC5618075; doi:10.3390/antiox6030047)
Supplement: Supplementary file 1 [file antioxidants-06-00047-s001.pdf]

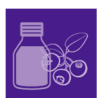

## Supplementary Materials

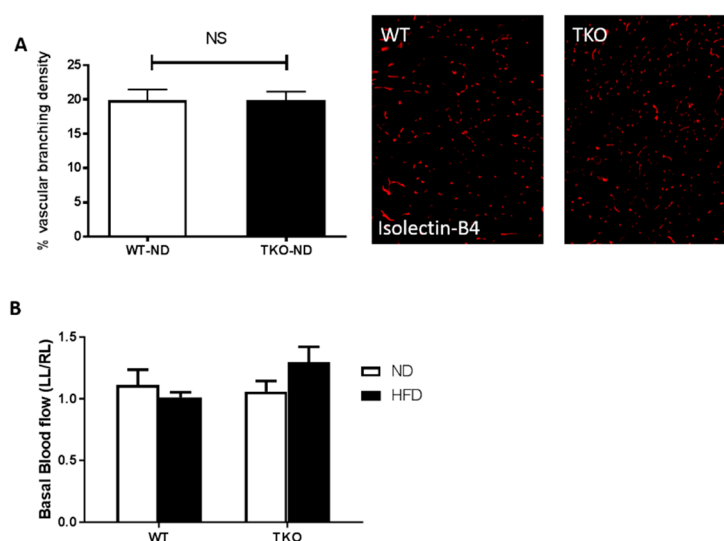

**Figure S1.** (A). Representative images and statistical analysis show that there was no significant difference in % vascular branching density assessed by FIJI analysis of isolectin-stained sections of gastrocnemius muscles from TKO-ND and WT-ND ( $n = 4-5$ ); (B). Vascular recovery was assessed by measuring blood flow using laser Doppler of ischemic leg (left leg, LL) compared to non-ischemic side (right leg, RL) control in each animal at base. There was no significant difference in basal blood flow between WT and TKO mice under both ND and HFD.

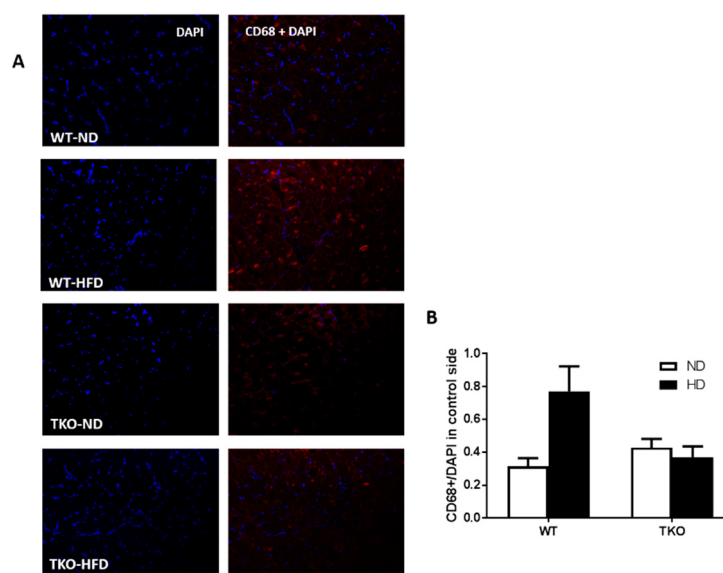

**Figure S2.** (A). Representative images of skeletal muscles from control non-ischemic side from various groups stained for CD68+ cells (red), and DAP (blue). (B).  $2 \times 2$ -way ANOVA statistical analysis showed no significant interaction among the groups. HFD caused a strong trend to increase infiltration of CD68+ cells in WT-HFD compared to ND-WT, TXNIP deletion abolished this effect. ( $n = 4-5$ ).
